# Supplementary material for: Cimifugin Ameliorates Lipotoxicity‐Induced Hepatocyte Damage and Steatosis through TLR4/p38 MAPK‐ and SIRT1‐Involved Pathways
Source: Hindawi journal article supplement (doi:10.1155/2022/4557532), 2022-01-01
Supplement: f1 [file 4557532.f1.pdf]

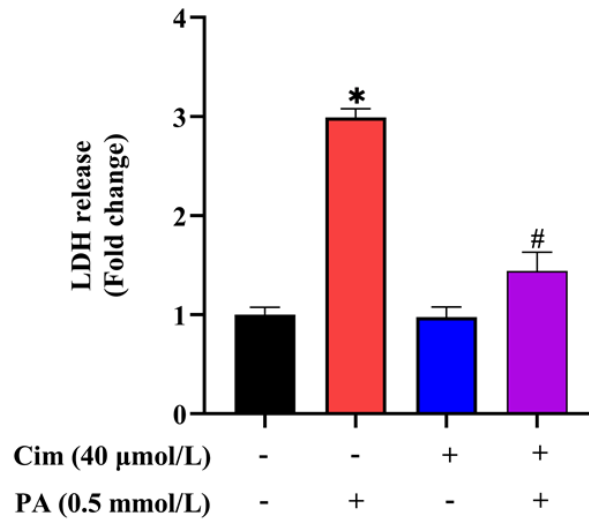

**Figure S1** HepG2, a widely used human hepatoma cell line, was obtained from American Type Culture Collection (ATCC, Manassas, VA). HepG2 hepatocytes were cultured in Dulbecco's Modified Eagle Medium (DMEM, Gibco) containing 10% (v/v) fetal bovine serum (FBS, Biological Industries) at 37 °C in a humidified atmosphere of 5% CO<sub>2</sub> and 95% air. HepG2 hepatocytes were treated with palmitic acid (PA, 0.5 mM) for 16 h with or without cimifugin (Cim, 40 μM) pretreatment for 2 h. Intracellular triglyceride (TG) was measured as described in the Methods. All values are denoted as means ± SD from at least three independent batches of cells. \* and # reflect statistical difference ( $P < 0.05$ ) compared with control group and palmitate treatment group respectively.

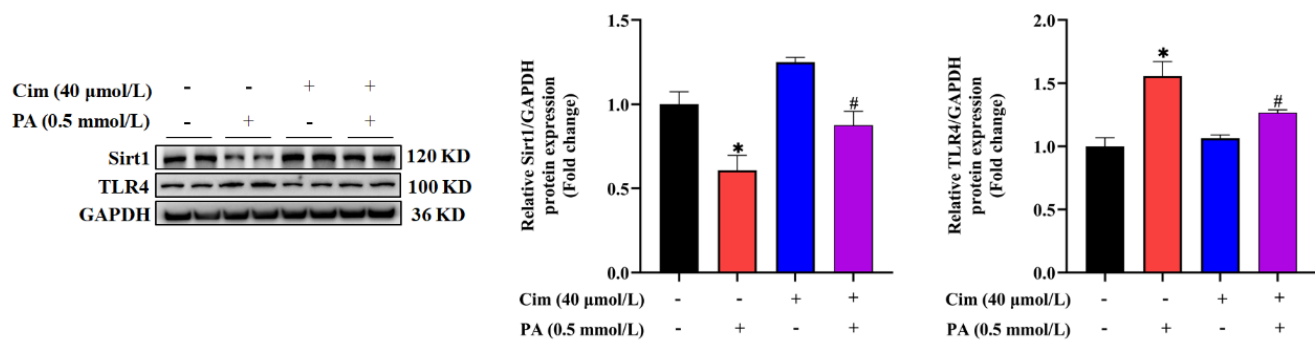

**Figure S2** The source and culture method of HepG2 hepatocytes were same as those of Figure S1. HepG2 hepatocytes were treated with palmitic acid (PA, 0.5 mM) for 16 h with or without cimifugin (Cim, 40  $\mu$ M) pretreatment for 2 h. SIRT1 and TLR4 expressions were measured by immunoblotting. \* and # reflect statistical difference ( $P < 0.05$ ) compared with control group and palmitate treatment group respectively.

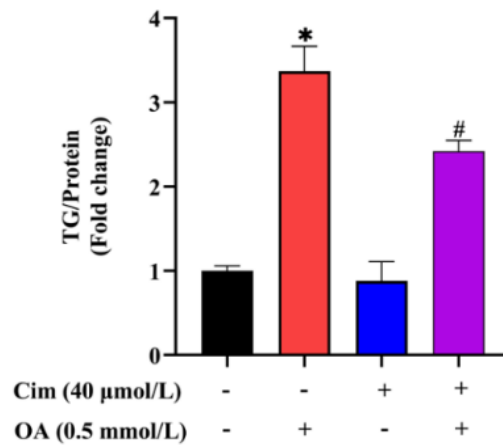

**Figure S3** The source and culture method of HepG2 hepatocytes were same as those of Figure S1. HepG2 hepatocytes were treated with oleic acid (OA, 0.5 mM) for 16 h with or without cimifugin (Cim, 40 μM) pretreatment for 2 h. Intracellular triglyceride (TG) was measured as described in the Methods. \* and # reflect statistical difference ( $P < 0.05$ ) compared with control group and palmitate treatment group respectively.

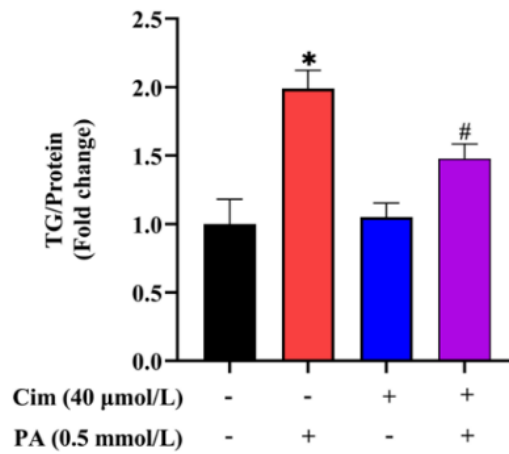

**Figure S4** The source and culture method of HepG2 hepatocytes were same as those of Figure S1. HepG2 hepatocytes were treated with palmitic acid (PA, 0.5 mM) for 16 h with or without cimifugin (Cim, 40 μM) pretreatment for 2 h. Intracellular triglyceride (TG) was measured as described in the Methods. \* and # reflect statistical difference ( $P < 0.05$ ) compared with control group and palmitate treatment group respectively.

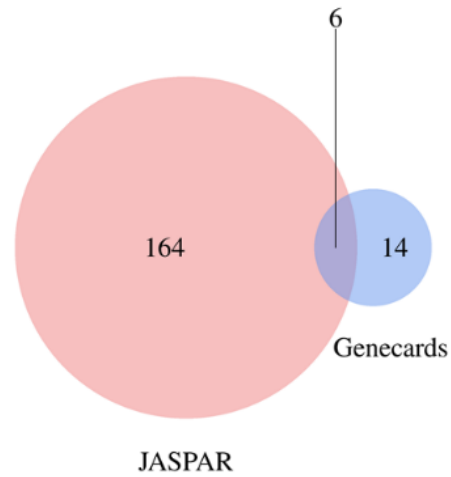

**Figure S5** The TLR4 promoter sequence (NC\_000070.7, -2000~100) were searched in the websites including JASPAR (<https://jaspar.genereg.net/>) and Genecards data base (<http://www.genecards.org>), and the co-existing nuclear factors were obtained in these data bases.
